# Supplementary material for: Nutritional Interventions with Bacillus coagulans Improved Glucose Metabolism and Hyperinsulinemia in Mice with Acute Intermittent Porphyria
Source: MDPI journal article supplement (doi:10.3390/ijms241511938), 2023-07-26

Figure S1

(A)

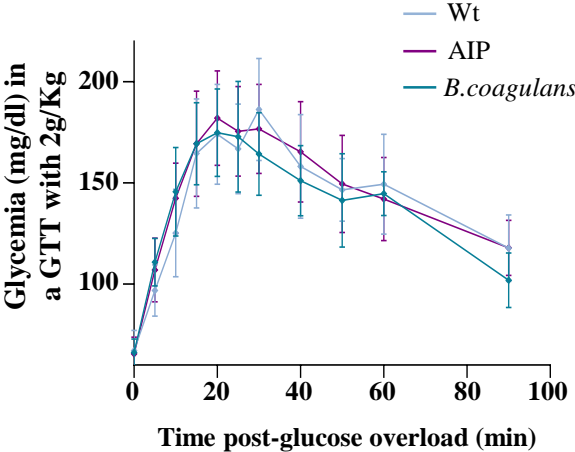

(B)

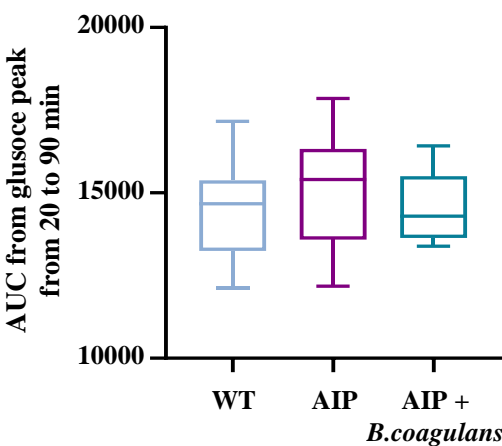

Figure S2

(A)

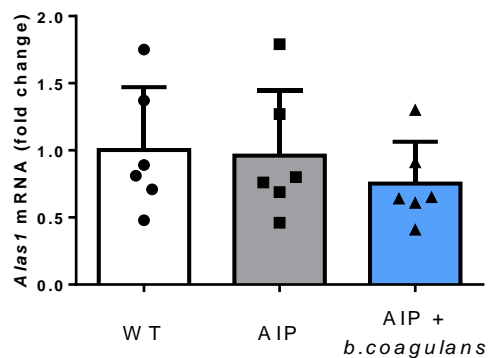

(B)

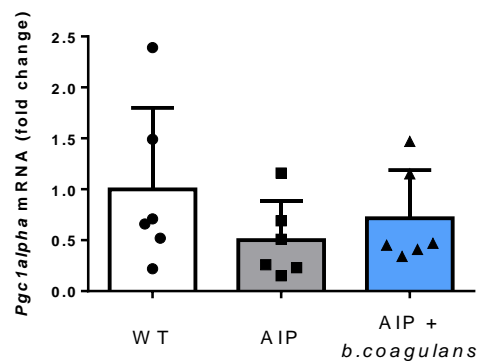

(C)

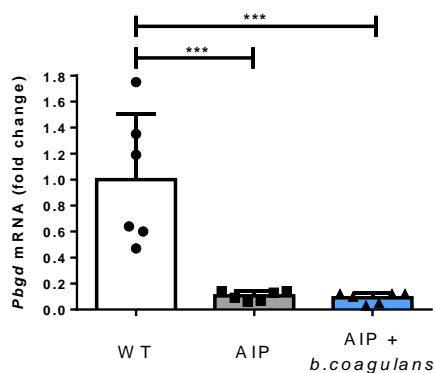

(D)

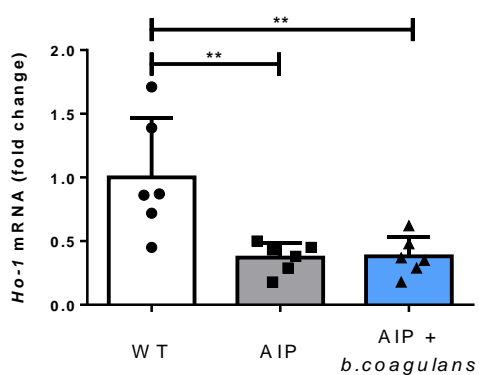

(E)

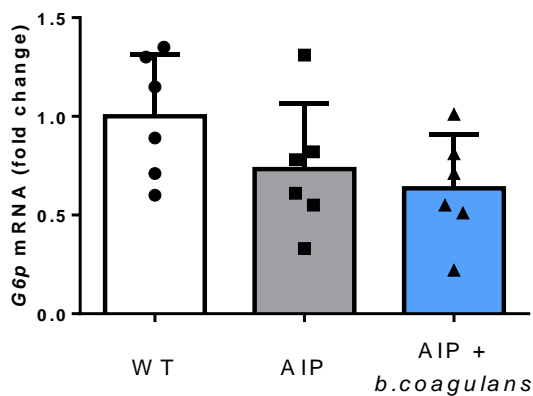

(F)

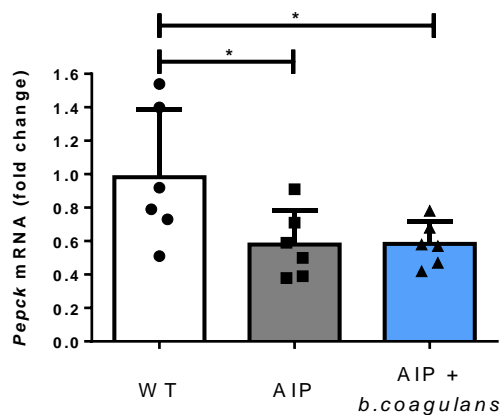

Figure S3

(A)

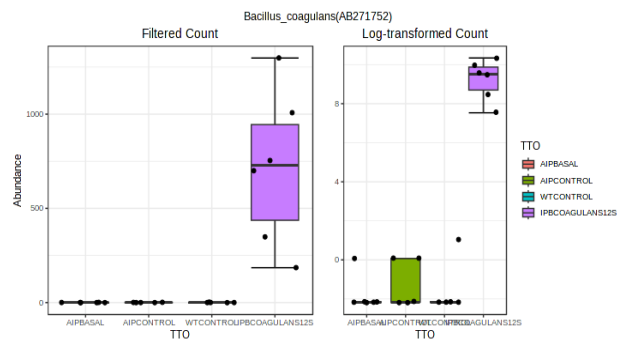

(B) Alfa diversity (Observed,  $P=0.003$ )

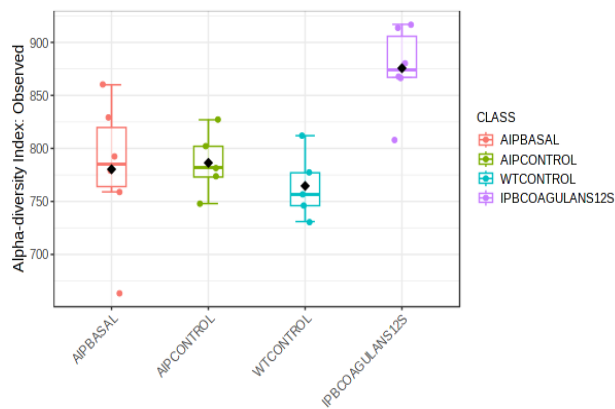

(C) Beta diversity :  
(Feature-level PCoA Bray-Curtis,  $P=0.001$ )

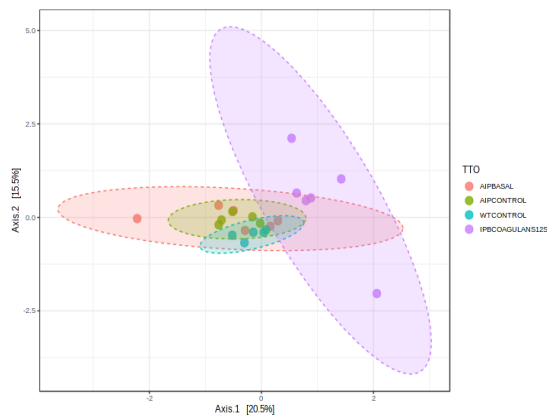

Supplement: s1 [file s1]
